# Supplementary material for: Leaf Venation Architecture in Relation to Leaf Size Across Leaf Habits and Vein Types in Subtropical Woody Plants
Source: Frontiers journal article supplement (doi:10.3389/fpls.2022.873036), 2022-05-06
Supplement: Image_1.pdf [file Image_1.pdf]

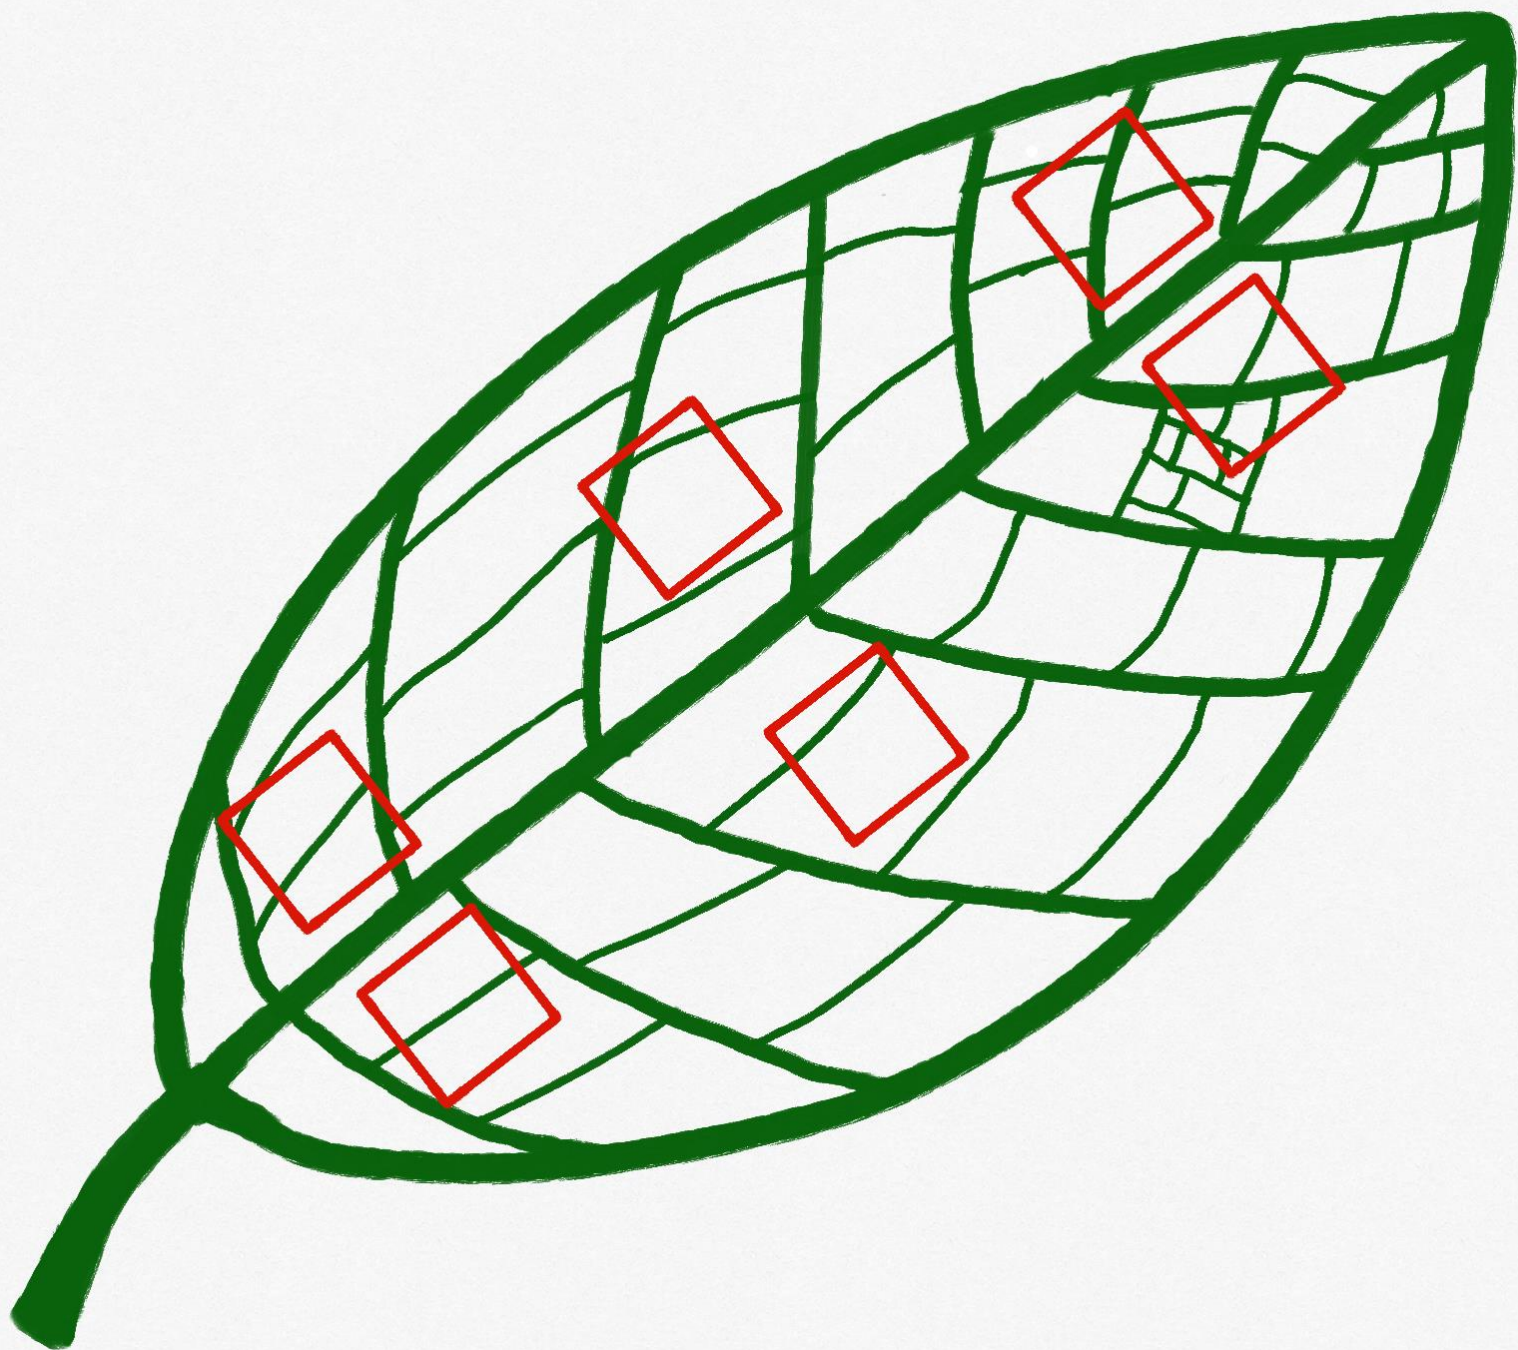

Figure S1: The illustration of sampling positions for minor veins within a leaf. Six subsamples were selected from symmetrical locations of the tip, middle, and bottom of the leaf.
