# Supplementary material for: Leaf Venation Architecture in Relation to Leaf Size Across Leaf Habits and Vein Types in Subtropical Woody Plants
Source: Front Plant Sci. 2022 May 6;13:873036. doi: 10.3389/fpls.2022.873036 (PMC9121095; doi:10.3389/fpls.2022.873036)
Supplement: Supplementary file 1 [file Table_1.XLSX]

## Sheet: Table S1
Table S1. Species means ± standard errors for vein traits and leaf sizes of 38 broad-leaved woody trees in subtropical forest.
Latin name	Family	Leaf type	Leaf habit	Leaf mass (g)	Leaf area (cm2)	Major vein length (cm)	Minor vein length (cm)	Total vein length (cm)	Major vein density (cm∙cm-2)	Minor vein density (cm∙cm-2)	Total vein density (cm∙cm-2)	Major vein cell wall mass per length (g∙cm-1×10-6)	Minor vein cell wall mass per length (g∙cm-1×10-6)	Total cell wall mass per length (g∙cm-1×10-6)	Major: minor vein densities
Liquidambar formosana	Hamamelidaceae	Palmate	Deciduous	0.77 ± 0.06	73.94 ± 5.84	115.74 ± 7.15	7920.86 ± 697.35	8036.59 ± 702.63	1.59 ± 0.08	106.51 ± 2.58	108.1 ± 2.54	90.78 ± 4.51	2.23 ± 0.05	3.51 ± 0.08	15.1 ± 1.03
Acer palmatum	Aceraceae	Palmate	Deciduous	0.20 ± 0.02	10.46 ± 1.10	47.71 ± 3.35	927.82 ± 82.54	975.53 ± 85.08	4.7 ± 0.29	89.66 ± 3.24	94.36 ± 3.37	38.81 ± 2.5	3.26 ± 0.11	5 ± 0.17	52.57 ± 3.01
Platanus acerifolia	Platanaceae	Palmate	Deciduous	1.31 ± 0.18	125.69 ± 16.85	147.69 ± 12.47	13355.53 ± 1866.07	13503.22 ± 1878.02	1.23 ± 0.07	105.32 ± 1.56	106.56 ± 1.52	112.76 ± 7.38	3.91 ± 0.06	5.12 ± 0.07	11.74 ± 0.81
Sassafras tzumu	Lauraceae	Palmate	Deciduous	0.56 ± 0.09	106.01 ± 16.43	131.42 ± 15.33	9337.55 ± 1196.73	9468.98 ± 1211.94	1.3 ± 0.06	90.81 ± 2.88	92.11 ± 2.93	302.15 ± 13.17	8.51 ± 0.27	12.62 ± 0.41	14.27 ± 0.27
Acer pubinerve	Aceraceae	Palmate	Deciduous	0.29 ± 0.04	46.29 ± 6.16	110.92 ± 9.37	4648.46 ± 628.46	4759.38 ± 636.59	2.52 ± 0.1	101.19 ± 4.94	103.7 ± 4.95	116.71 ± 6.84	6.21 ± 0.3	8.81 ± 0.41	25.1 ± 1.59
Acer acutum	Aceraceae	Palmate	Deciduous	0.21 ± 0.01	39.00 ± 1.10	96.87 ± 1.87	3818.01 ± 157.46	3914.88 ± 158.31	2.49 ± 0.06	98.03 ± 2.46	100.52 ± 2.44	119.44 ± 2.6	8.43 ± 0.22	11.18 ± 0.28	25.55 ± 0.95
Vernicia fordii	Euphorbiaceae	Palmate	Deciduous	1.64 ± 0.27	196.0 ± 32.54	188.55 ± 19.49	17883.21 ± 3501.75	18071.76 ± 3518.84	1.05 ± 0.09	89.84 ± 6.99	90.89 ± 6.96	218.72 ± 16.74	2.82 ± 0.22	5.3 ± 0.41	12.15 ± 1.5
Hovenia acerba	Rhamnaceae	Palmate	Deciduous	1.24 ± 0.18	74.99 ± 11.17	114.51 ± 9.43	6256.72 ± 1088.05	6371.24 ± 1096.43	1.63 ± 0.15	82.58 ± 2.63	84.21 ± 2.55	127.57 ± 12.07	10.71 ± 0.37	12.87 ± 0.42	19.95 ± 2.34
Quercus serrata	Fagaceae	Pinnate	Deciduous	0.26 ± 0.02	19.88 ± 1.66	61.84 ± 3.4	1852.59 ± 133.2	1914.44 ± 136.06	3.17 ± 0.16	93.48 ± 1.76	96.64 ± 1.87	125.91 ± 6.14	10.7 ± 0.19	14.43 ± 0.27	33.95 ± 1.24
Liriodendron chinense	Magnoliaceae	Pinnate	Deciduous	0.66 ± 0.03	139.44 ± 6.08	101.77 ± 3.63	8347.43 ± 569.27	8449.2 ± 572.59	0.74 ± 0.01	59.46 ± 1.89	60.2 ± 1.89	293.83 ± 3.97	6.17 ± 0.2	9.71 ± 0.31	12.57 ± 0.47
Quercus acutissima	Fagaceae	Pinnate	Deciduous	0.68 ± 0.05	84.46 ± 6.67	127.32 ± 7.76	8436.86 ± 644.66	8564.18 ± 651.4	1.59 ± 0.07	100.1 ± 1.38	101.68 ± 1.39	268.6 ± 9.05	11.04 ± 0.15	14.92 ± 0.2	15.87 ± 0.71
Litsea cubeba	Lauraceae	Pinnate	Deciduous	0.08 ± 0.00	13.38 ± 0.64	44.98 ± 2.38	1018.76 ± 111.28	1063.74 ± 112.54	3.36 ± 0.03	75.87 ± 6.94	79.23 ± 6.92	82.28 ± 0.65	1.73 ± 0.17	5.22 ± 0.49	45.56 ± 4.91
Ilex micrococca	Aquifoliaceae	Pinnate	Deciduous	0.33 ± 0.03	47.57 ± 3.88	78.94 ± 3.73	3742.18 ± 297.27	3821.12 ± 300.72	1.68 ± 0.06	78.67 ± 1.03	80.35 ± 1.06	195.55 ± 7.54	4.69 ± 0.06	8.67 ± 0.11	21.46 ± 0.71
Emmenopterys henryi	Rubiaceae	Pinnate	Deciduous	1.27 ± 0.21	179.47 ± 29.00	135.31 ± 15.39	9414.85 ± 1690	9550.15 ± 1704.89	0.78 ± 0.03	52.06 ± 0.95	52.85 ± 0.94	604.58 ± 29.4	14.79 ± 0.27	23.4 ± 0.42	15.04 ± 0.75
Magnolia denudata	Magnoliaceae	Pinnate	Deciduous	0.41 ± 0.08	94.73 ± 18.05	118.77 ± 16.02			1.32 ± 0.07			214.73 ± 12.04
Symplocos anomala	Symplocaceae	Pinnate	Evergreen	0.17 ± 0.01	14.99 ± 1.26	40.94 ± 1.07	877.6 ± 82.88	918.54 ± 82.91	2.79 ± 0.21	58.41 ± 1.72	61.2 ± 1.66	119.9 ± 11.19	4.24 ± 0.12	9.37 ± 0.25	48.11 ± 4.42
Elaeocarpus decipiens	Elaeocarpaceae	Pinnate	Evergreen	0.22 ± 0.03	22.29 ± 2.56	51.12 ± 2.69	1757.72 ± 222.52	1808.85 ± 225.2	2.36 ± 0.13	78.36 ± 1.17	80.72 ± 1.08	162.36 ± 9.43	6.98 ± 0.11	11.47 ± 0.16	30.53 ± 2.03
Osmanthus fragrans	Oleaceae	Pinnate	Evergreen	0.26 ± 0.03	24.79 ± 2.69	52.59 ± 3.48	1880.59 ± 187.64	1933.18 ± 190.59	2.16 ± 0.1	76.16 ± 3.15	78.31 ± 3.15	194 ± 9.22	25.26 ± 0.98	29.88 ± 1.13	28.49 ± 1.7
Lithocarpus harlandii	Fagaceae	Pinnate	Evergreen	0.61 ± 0.05	39.33 ± 3.14	90.31 ± 3.25	2917.95 ± 246	3008.26 ± 248.88	2.35 ± 0.1	74.49 ± 1.93	76.84 ± 1.94	187.95 ± 8.65	32.36 ± 0.88	37.07 ± 0.99	31.61 ± 1.48
Magnolia grandiflora	Magnoliaceae	Pinnate	Evergreen	1.28 ± 0.17	109.65 ± 15.02	136.43 ± 12.58	6571.74 ± 987.69	6708.17 ± 999.71	1.29 ± 0.1	59.37 ± 1.61	60.66 ± 1.61	567.75 ± 43.01	29.19 ± 0.82	40.41 ± 1.11	21.94 ± 1.89
Photinia glabra	Rosaceae	Pinnate	Evergreen	0.16 ± 0.02	10.83 ± 1.66	41.45 ± 3.21	951.98 ± 157.18	993.43 ± 160.39	4.03 ± 0.29	87.49 ± 0.97	91.52 ± 0.87	73.41 ± 5.33	8.78 ± 0.1	11.54 ± 0.11	46.13 ± 3.49
Machilus thunbergii	Lauraceae	Pinnate	Evergreen	0.36 ± 0.03	30.45 ± 2.46	76.77 ± 3.09	2307.04 ± 238.33	2383.81 ± 241.16	2.6 ± 0.13	75.5 ± 4.33	78.1 ± 4.3	235.06 ± 10.8	29.83 ± 1.55	36.59 ± 1.83	35 ± 2.85
Daphniphyllum macropodum	Euphorbiales	Pinnate	Evergreen	0.24 ± 0.02	22.36 ± 1.65	56.63 ± 2.33	1195.78 ± 77.25	1252.41 ± 79.14	2.6 ± 0.1	53.72 ± 1.21	56.32 ± 1.26	141.87 ± 6	10.15 ± 0.24	16.11 ± 0.37	48.37 ± 1.68
Castanopsis fargesii	Fagaceae	Pinnate	Evergreen	0.31 ± 0.00	29.55 ± 0.40	78.75 ± 1.38	2942.54 ± 74.84	3021.3 ± 74.33	2.67 ± 0.05	99.6 ± 2.62	102.27 ± 2.6	170.59 ± 2.85	17.29 ± 0.44	21.3 ± 0.53	26.97 ± 0.97
Diospyros morrisiana	Ebenaceae	Pinnate	Evergreen	0.26 ± 0.02	21.05 ± 1.90	43.82 ± 1.79	1727.88 ± 220.43	1771.71 ± 221.17	2.14 ± 0.15	81.41 ± 5.58	83.55 ± 5.48	72.48 ± 4.91	2.45 ± 0.16	4.23 ± 0.26	27.11 ± 3.38
Symplocos stellaris	Symplocaceae	Pinnate	Evergreen	0.39 ± 0.05	28.17 ± 3.57	69.16 ± 7.04	1798.83 ± 255.05	1867.99 ± 259.7	2.56 ± 0.2	63.3 ± 2.27	65.86 ± 2.09	120.47 ± 9.3	3.99 ± 0.14	8.38 ± 0.25	41.13 ± 4.31
Schima superba	Theaceae	Pinnate	Evergreen	0.40 ± 0.04	31.12 ± 3.25	72.25 ± 6.27	2129.81 ± 286.91	2202.06 ± 291.19	2.37 ± 0.06	68.81 ± 7.1	71.18 ± 7.1	154.32 ± 4	16.44 ± 1.94	21.19 ± 2.4	36.38 ± 4.26
Manglietia fordiana	Magnoliaceae	Pinnate	Evergreen	0.70 ± 0.06	68.28 ± 6.15	104.36 ± 7.89	4760.15 ± 495.79	4864.51 ± 503.18	1.55 ± 0.08	69.53 ± 1.8	71.08 ± 1.85	281.62 ± 14.81	7.83 ± 0.2	13.74 ± 0.36	22.31 ± 0.93
Castanopsis carlesii	Fagaceae	Pinnate	Evergreen	0.11 ± 0.01	7.69 ± 1.00	35.17 ± 2.47	854.76 ± 110.32	889.93 ± 112.59	4.8 ± 0.35	111.59 ± 2.35	116.38 ± 2.35	90.34 ± 6.32	11.22 ± 0.25	14.39 ± 0.31	43.17 ± 3.36
Cyclobalanopsis glauca	Fagaceae	Pinnate	Evergreen	0.27 ± 0.02	18.99 ± 1.45	62.02 ± 2.99	2117.52 ± 163.06	2179.53 ± 165.82	3.32 ± 0.12	111.56 ± 3.67	114.88 ± 3.69	96.59 ± 3.39	14.12 ± 0.46	16.49 ± 0.52	29.89 ± 1.38
Camellia japonica	Theaceae	Pinnate	Evergreen	0.34 ± 0.02	24.73 ± 1.34	47.43 ± 1.39	1237.72 ± 81.44	1285.14 ± 82.28	1.94 ± 0.1	50.1 ± 1.14	52.04 ± 1.14	237.34 ± 10.26	10.64 ± 0.26	19.04 ± 0.45	39.02 ± 2.2
Symplocos sumuntia	Symplocaceae	Pinnate	Evergreen	0.34 ± 0.03	39.88 ± 3.84	78.44 ± 3.17	2320.9 ± 204.89	2399.34 ± 207.84	2.02 ± 0.13	58.41 ± 1.39	60.43 ± 1.49	135.9 ± 8.67	5.67 ± 0.14	9.95 ± 0.25	34.52 ± 1.75
Castanopsis sclerophylla	Fagaceae	Pinnate	Evergreen	0.40 ± 0.02	30.63 ± 1.58	75.26 ± 2.85	2771.17 ± 172.16	2846.44 ± 174.52	2.49 ± 0.08	90.64 ± 1.45	93.13 ± 1.45	171.91 ± 5.72	21.54 ± 0.34	25.54 ± 0.4	27.55 ± 1.01
Cyclobalanopsis gracilis	Fagaceae	Pinnate	Evergreen	0.18 ± 0.02	14.65 ± 1.32	46.7 ± 3.47	1440.3 ± 119.95	1487 ± 123.25	3.23 ± 0.15	98.57 ± 2.6	101.81 ± 2.73	154.64 ± 6.44	18.05 ± 0.45	22.34 ± 0.57	32.86 ± 0.88
Cyclobalanopsis myrsinaefolia	Fagaceae	Pinnate	Evergreen	0.13 ± 0.02	16.32 ± 2.17	49.1 ± 2.42	1464.04 ± 235.62	1513.14 ± 237.99	3.16 ± 0.21	88.82 ± 2.93	91.98 ± 2.82	136.91 ± 10.98	17.6 ± 0.58	21.59 ± 0.66	35.84 ± 3.05
Myrica rubra	Myricaceae	Pinnate	Evergreen	0.22 ± 0.02	20.76 ± 2.32	49.1 ± 3.42	1100.84 ± 118.7	1149.94 ± 121.88	2.43 ± 0.12	53.2 ± 0.94	55.64 ± 0.94	239.08 ± 11.7	21.03 ± 0.37	30.46 ± 0.51	45.94 ± 2.49
Cyclobalanopsis sessilifolia	Fagaceae	Pinnate	Evergreen	0.20 ± 0.02	10.74 ± 1.30	44.31 ± 4.49	962.02 ± 112.99	1006.33 ± 117.15	4.19 ± 0.15	89.95 ± 2.27	94.14 ± 2.3	137.05 ± 4.55	19.5 ± 0.52	24.71 ± 0.63	46.68 ± 1.91
Phoebe chekiangensis	Lauraceae	Pinnate	Evergreen	0.33 ± 0.02	41.49 ± 2.42	86.7 ± 4.88	4985.91 ± 244.31	5072.6 ± 247.42	2.11 ± 0.09	120.44 ± 1.38	122.54 ± 1.38	150.28 ± 6.49	9.37 ± 0.11	11.77 ± 0.14	17.52 ± 0.79
Acer cinnamomifolium	Aceraceae	Pinnate	Evergreen	0.10 ± 0.01	12.32 ± 1.74	36.08 ± 3.74	808.47 ± 93.49	844.56 ± 97.22	2.97 ± 0.1	65.81 ± 1.8	68.78 ± 1.91	109.29 ± 3.97	14.39 ± 0.4	18.47 ± 0.52	45.23 ± 0.31
